# Supplementary material for: Amentoflavone-Enriched Selaginella rossii Warb. Suppresses Body Weight and Hyperglycemia by Inhibiting Intestinal Lipid Absorption in Mice Fed a High-Fat Diet
Source: MDPI journal article supplement (doi:10.3390/life12040472), 2022-03-24
Supplement: s1 [file s1]

## Supplementary file

# **Amentoflavone-Enriched *Selaginella rossii* Warb. Suppresses Body Weight and Hyperglycemia by Inhibiting Intestinal Lipid Absorption in Mice Fed a High-Fat Diet**

Hwa Lee <sup>1,†</sup>, Seona Cho <sup>1</sup>, Soo-Yong Kim <sup>2</sup>, Jeongha Ju <sup>1,3</sup>, Sang Woo Lee <sup>2</sup>, Sangho Choi <sup>2</sup>, Hulin Li <sup>4</sup>, Renzhe Piao <sup>4</sup>, Ho-Yong Park <sup>1</sup> and Tae-Sook Jeong <sup>1,\*</sup>

<sup>1</sup> Industrial Bio-Materials Research Center, Korea Research Institute of Bioscience and Biotechnology (KRIBB), Daejeon 34141, Korea; leehua@kribb.re.kr (H.L.); baby5624@naver.com (S.C.); wjdgk0605@naver.com (J.J.); hypark@kribb.re.kr (H.-Y.P.)

<sup>2</sup> International Biological Material Center, KRIBB, Daejeon 34141, Korea; soodole@kribb.re.kr (S.-Y.K.); ethnolee@kribb.re.kr (S.W.L.); decoy0@kribb.re.kr (S.C.)

<sup>3</sup> Department of Medical Biotechnology, Yeungnam University, Gyeongsan 38541, Korea

<sup>4</sup> Department of Agronomy, Agriculture College of Yanbian University, Yanji 133000, China; lhlsym@ybu.edu.cn (H.L.); rzpiao@ybu.edu.cn (R.P.)

\* Correspondence: tsjeong@kribb.re.kr; Tel.: +82-42-860-4558

† Earlier known as Hua Li.

1. Primer sequences used in this article are described in Table S1.

**Table S1.** Primers used for mRNA quantification.

| Gene Name                     | Forward Primer                | Reverse Primer            |
|-------------------------------|-------------------------------|---------------------------|
| <i>Abca1</i> (NM_013454)      | TCAATGGAAGGTTCAAGTGC          | TCATCACTTTGGTCCTTGGC      |
| <i>Abcg5</i> (NM_031884)      | TCTGTTTCCCATGCTGAGAG          | CGGGTGATTTAGCATAGAGG      |
| <i>Abcg8</i> (NM_026180)      | CAATGTCATCCTGGATGTCG          | ATGGAGAAGGTGAAGTTGCC      |
| <i>Cd36</i> (NM_007643)       | TGCTGGAGCTGTTATTGGTG          | CTCAAAGATGGCTCCATTGG      |
| <i>Dgat1</i> (NM_010046)      | ACAACCTGACCTACCGAGAT          | AGTAGGGACCATCCACTGTT      |
| <i>Dgat2</i> (NM_026384)      | GCTGGCATTGACTGGAACA           | TGGTCAGCAGGTTGTGTGTCTT    |
| <i>Fabp1</i> (NM_017399)      | GCAAGTACCAATTGCAGAGCCAGG      | TCATTGCGGACCACTTTGGG      |
| <i>Fabp4</i> (NM_024406)      | TTTGTGGGAACCTGGAAGCT          | CACGCCCAGTTTGAAGGAAA      |
| <i>Fabp6</i> (NM_008375)      | TCTTCCAGGAGACGTGATTG          | TACGCGCTCATAGGTCACAT      |
| <i>Fas</i> (NM_007988)        | TGTGAGTGGTTCAGAGGCAT          | TTCTGTAGTGCCAGCAAGCT      |
| <i>Gapdh</i> (NM_001001303)   | ACATCATCCCTGCATCCACT          | AGATCCACGACGGACACATT      |
| <i>Hmgcr</i> (NM_008255)      | TAGGCTTGGTCCTTGTTCAC          | GCTTCTTTGAGGTCACGAC       |
| <i>Mlxipl</i> (NM_021455)     | CAGATGCGGGACATGTTTGA          | AATAAAGGTCGGATGAGGATGCT   |
| <i>Npc1l1</i> (NM_207242)     | ACGGAACCTCACAGGACTTACAGAA     | TTGCTGGTAGAACACATTGGAGAT  |
| <i>Nr1h3</i> (NM_013839)      | TGCCCCATGGACACCTACA           | CTTGCCGCTTCAGTTTCTTCA     |
| <i>Ppara</i> (NM_011144)      | CCTGAACATCGAGTGTGCAA          | GTACTGGCATTGTGTTCCGGT     |
| <i>Pparg</i> (NM_001127330)   | ATGTCTCACAATGCCATCAGGTT       | GCGGGAAGGACTTTATGTATGAGT  |
| <i>Slc2a2</i> (NM_031197)     | TTTGTCAATCGCCCTCTGCTT         | GCAGCGATTTCCTCAAAAGACT    |
| <i>Slc2a5</i> (NM_019741)     | GTGTCCACTGGCTCTCTAACTCA       | GGTGGTGAGGAAACAGATGGTT    |
| <i>Slc5a1</i> (NM_019810)     | GCCTCTCTCTTTGCCAGTAACATT      | CAAGGCGTTCATTCAAAGC       |
| <i>Slc6a9</i> (NM_001355175)  | CACTGCCATTGTGGATGAGGTA        | GATACAGGAGATGACAACCAAGGA  |
| <i>Slc8a2</i> (NM_148946)     | TAGTGGATGATGAAGAGTATGAGAAGAAG | TCTTGTCTCCATTCCCTTGTT     |
| <i>Slc15a1</i> (NM_053079)    | GGTTACCCGTTGAGCATCTTCTT       | TGCCATAGTAGGAGAATCTTTCACA |
| <i>Slc16a3</i> (NM_001038653) | GCGGTCAGCGTCTTTTCAA           | CCGTGTCGCTGTAGCCAAAT      |
| <i>Srebfl</i> (NM_011480)     | GAGCGAGCGTTGAACTGTAT          | ATGCTGGAGCTGACAGAGAA      |
| <i>Srebfl2</i> (NM_033218)    | TCCTCCATCAACGACAAAATCA        | ACTTGTGCATCTTGGCATCTGT    |

## 2. Comparison of amentoflavone (AMF) contents in extracts of *S. rossii* and other *Selaginellaceae* species

### Preparation of SR extracts and HPLC Analysis

The dried aerial part of *Selaginella rossii* (Barker) Warb (SR) were obtained from Yanbian University (Yanji, China) delivered by the International Biological Material Research Center of the Korea Research Institute of Bioscience and Biotechnology (KRIBB, Daejeon, Korea). The 1 g dried SR powder was extracted using 10 mL MeOH at 20–25 °C for 48 h. The extract of MeOH was concentrated *in vacuo* to yield brown residue. The MeOH extracts of *Selaginella tamariscina* and *Selaginella involvens* were obtained from the Korea Plant Extract Bank (KPEB, Ochang, Korea).

The components of MeOH extracts of *Selaginellaceae* were analyzed using a high-performance liquid chromatography-diode array detector (HPLC-DAD) system (Shimadzu Corp., Tokyo, Japan). The extracts were separated on a Brownlee SPP C18 column (4.6 × 50 mm, 2.7 µm; Perkin Elmer, Inc, Waltham, MA, USA). The compositions of mobile phase are 0.1% acetic acid in water (mobile phase A) and acetonitrile (mobile phase B). The linear gradient elution program was as

follows: 5–50% B at 0–15 min, 50–100% B at 15–20 min, 100% B at 20–25 min, 100–5% B at 25–27 min, 5% B at 27–30 min. The absorbance of the HPLC profile was 267 nm, and the flow rate was 1.8 mL/min. Amentoflavone (AMF, Biopurify Phytochemicals Ltd., Chengdu, China) was used for analysis of AMF content.

Compared with other *Selaginellaceae* species such as *S. tamariscina* and *S. involvens*, SR extracts showed much higher AMF contents (Figure S1 and Table S2).

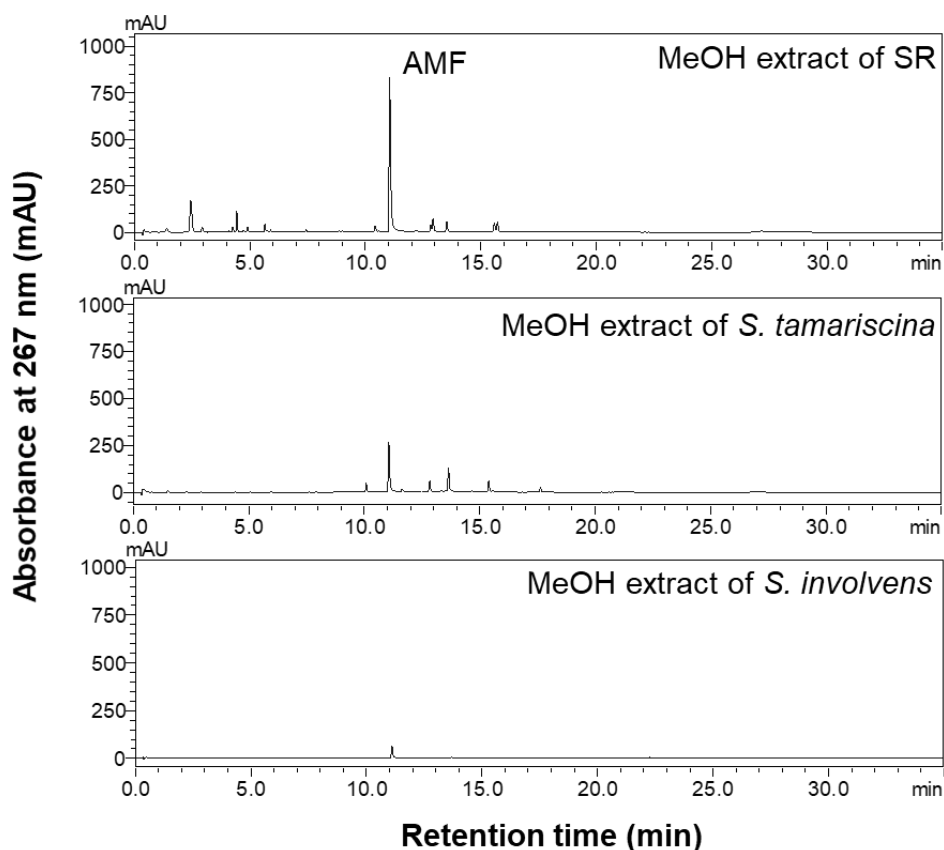

**Figure S1.** HPLC profiles of extracts of *S. rossii* (SR) and other *Selaginellaceae* species. Chromatograms of HPLC for methanol (MeOH) extract of SR, *S. tamariscina*, and *S. involvens* extracts (5 mg/mL) were detected at 267 nm.

**Table S2.** AMF contents of *S. rossii* and other *Selaginellaceae* species.

| Samples                                  | AMF Contents (mg/g extract) |
|------------------------------------------|-----------------------------|
| EtOH extract of <i>S. rossii</i> (SRE)   | 66.6                        |
| EtOAc extract of <i>S. rossii</i> (SREA) | 154.8                       |
| MeOH extract of <i>S. rossii</i>         | 89.2                        |
| MeOH extract of <i>S. tamariscina</i>    | 25.8                        |
| MeOH extract of <i>S. involvens</i>      | 6.5                         |

3. The protein absorption-related gene expressions of solute carrier family, including *Slc15a1*, *Slc8a2*, and *Slc6a9* were not changed in both SR extracts administered groups (Figure S2).

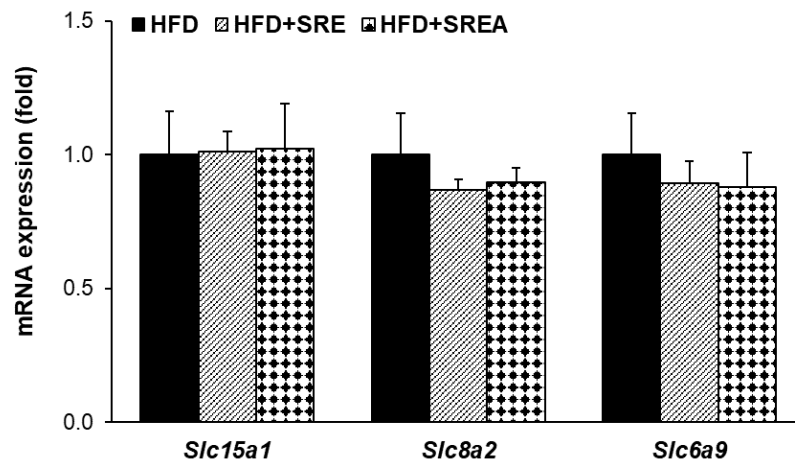

**Figure S2.** Short-term supplementation of SR extracts were not changed intestinal protein absorption-related gene expressions. The intestinal mRNA expression levels were measured by real-time qRT-PCR. Values are presented as means  $\pm$  SE ( $n = 7$ ).
